# Supplementary material for: Local expertise anchors biodiversity documentation, but geopolitical power drives parachute discovery
Source: Research Square preprint supplement (doi:10.21203/rs.3.rs-7724270/v1), 2025-09-30
Supplement: Supplementary file 1 [file d155301eaa33aade5e1d0e27.docx]

**SUPPLEMENTARY INFORMATION**

**Local expertise anchors biodiversity documentation, but geopolitical power drives parachute discovery**

Mario R. Moura1*, Raquel L. Carvalho2, Karoline Ceron3, Jhonny J. M. Guedes4, Matheus de T. Moroti4, Gabriel Nakamura5

Correspondence to: [mariormoura@gmail.com](mailto:mariormoura@gmail.com)

**This PDF file includes**

Supplementary Tables

Supplementary Figures

SUPPLEMENTARY TABLES

**Supplementary Table 1.**

**Variation Inflation Factor (VIF) for socioeconomic variables per country**. Analyses of holotype retention and outflow centrality used the 52-nation dataset, while analyses of holotype appropriation and inflow centrality used the 32-nation dataset.

| **Variable** | **52-nations dataset** | **32-nations dataset** |
| --- | --- | --- |
| Biodiversity and Habitat Issue | 1.059 | 2.043 |
| Colonial Origin | 1.356 | 2.244 |
| Global Peace Index | 1.140 | 1.475 |
| Human Capital Index | 1.488 | 3.270 |
| Research Spending (% of GDP) | 1.771 | - |
| Number of collected specimens | 1.301 | 1.366 |
| Number of research institutions | - | 2.080 |

**Supplementary Table 2.**

**Results of the beta-binomial generalized linear model (GLM) examining factors associated with holotype retention.** The table presents coefficient estimates (log-odds scale), standard errors, and significance values. Significant predictors at the p < 0.05 level are indicated in bold face. Total number of observations = 52. Model R² = 50.8%.

| ***Coefficients*** | ***Estimates*** | ***CI*** | ***P-value*** |
| --- | --- | --- | --- |
| Intercept | -1.34 | -1.84 – -0.85 | **<0.001** |
| Research Spending (% of GDP) | 0.11 | -0.53 – 0.76 | 0.731 |
| Biodiversity and Habitat Issue | 0.32 | -0.18 – 0.82 | 0.208 |
| Global Peace Index | -0.38 | -0.85 – 0.09 | 0.110 |
| Human Capital Index | -0.13 | -0.58 – 0.33 | 0.581 |
| Colonial Origin | 1.15 | 0.43 – 1.88 | **0.002** |
| Number of collected specimens | -0.16 | -0.68 – 0.35 | 0.534 |

**Supplementary Table 3.**

**Results of the beta-binomial generalized linear model (GLM) examining factors associated with holotype appropriation.** The table presents coefficient estimates (log-odds scale), standard errors, and significance values. Significant predictors at the p < 0.05 level are indicated in bold face. Total number of observations = 32. Model R² = 75.5%.

| ***Coefficients*** | ***Estimates*** | ***CI*** | ***P-value*** |
| --- | --- | --- | --- |
| Intercept | -0.55 | -1.27 – 0.18 | 0.138 |
| Number of institution | -0.20 | -1.00 – 0.60 | 0.621 |
| Number of collected specimens | 0.32 | -0.42 – 1.05 | 0.400 |
| Biodiversity and Habitat Issue | 0.99 | 0.19 – 1.79 | **0.015** |
| Global Peace Index | 0.13 | -0.49 – 0.76 | 0.673 |
| Human Capital Index | 0.98 | -0.63 – 2.60 | 0.233 |
| Colonial Origin | -1.32 | -2.27 – -0.38 | **0.006** |

**Supplementary Table 4.**

**Results of the Gamma generalized linear model (GLM) examining factors associated with holotype outflow centrality.** The table presents coefficient estimates (log-scale), standard errors, and significance values. Significant predictors at the p < 0.05 level are indicated in bold face. Total number of observations = 52. R2 Nagelkerke = 46.7%.

| ***Coefficients*** | ***Estimates*** | ***CI*** | ***P-value*** |
| --- | --- | --- | --- |
| Intercept | 1.37 | 1.27 – 1.47 | **<0.001** |
| Research Spending (% of GDP) | 0.04 | -0.10 – 0.18 | 0.568 |
| Number of collected specimens | 0.18 | 0.05 – 0.31 | **0.007** |
| Biodiversity and Habitat Issue | -0.17 | -0.27 – -0.06 | **0.002** |
| Global Peace Index | -0.03 | -0.13 – 0.08 | 0.638 |
| Human Capital Index | -0.20 | -0.32 – -0.08 | **0.001** |
| Colonial Origin | 0.25 | 0.13 – 0.37 | **<0.001** |

**Supplementary Table 5.**

**Results of the Gamma generalized linear model (GLM) examining factors associated with holotype inflow centrality.** The table presents coefficient estimates (log-scale), standard errors, and significance values. Significant predictors at the p < 0.05 level are indicated in bold face. Total number of observations = 32. R2 Nagelkerke = 82.4%.

| ***Coefficients*** | ***Estimates*** | ***CI*** | ***P-value*** |
| --- | --- | --- | --- |
| Intercept | 0.50 | 0.43 – 0.57 | **<0.001** |
| Number of research institutions | 0.13 | 0.03 – 0.24 | **0.012** |
| Number of collected specimens | 0.09 | 0.01 – 0.17 | **0.024** |
| Biodiversity and Habitat Issue | 0.16 | 0.05 – 0.26 | **0.003** |
| Global Peace Index | -0.01 | -0.10 – 0.07 | 0.756 |
| Human Capital Index | -0.04 | -0.17 – 0.09 | 0.525 |
| Colonial Origin | -0.26 | -0.37 – -0.15 | **<0.001** |

SUPPLEMENTARY FIGURES


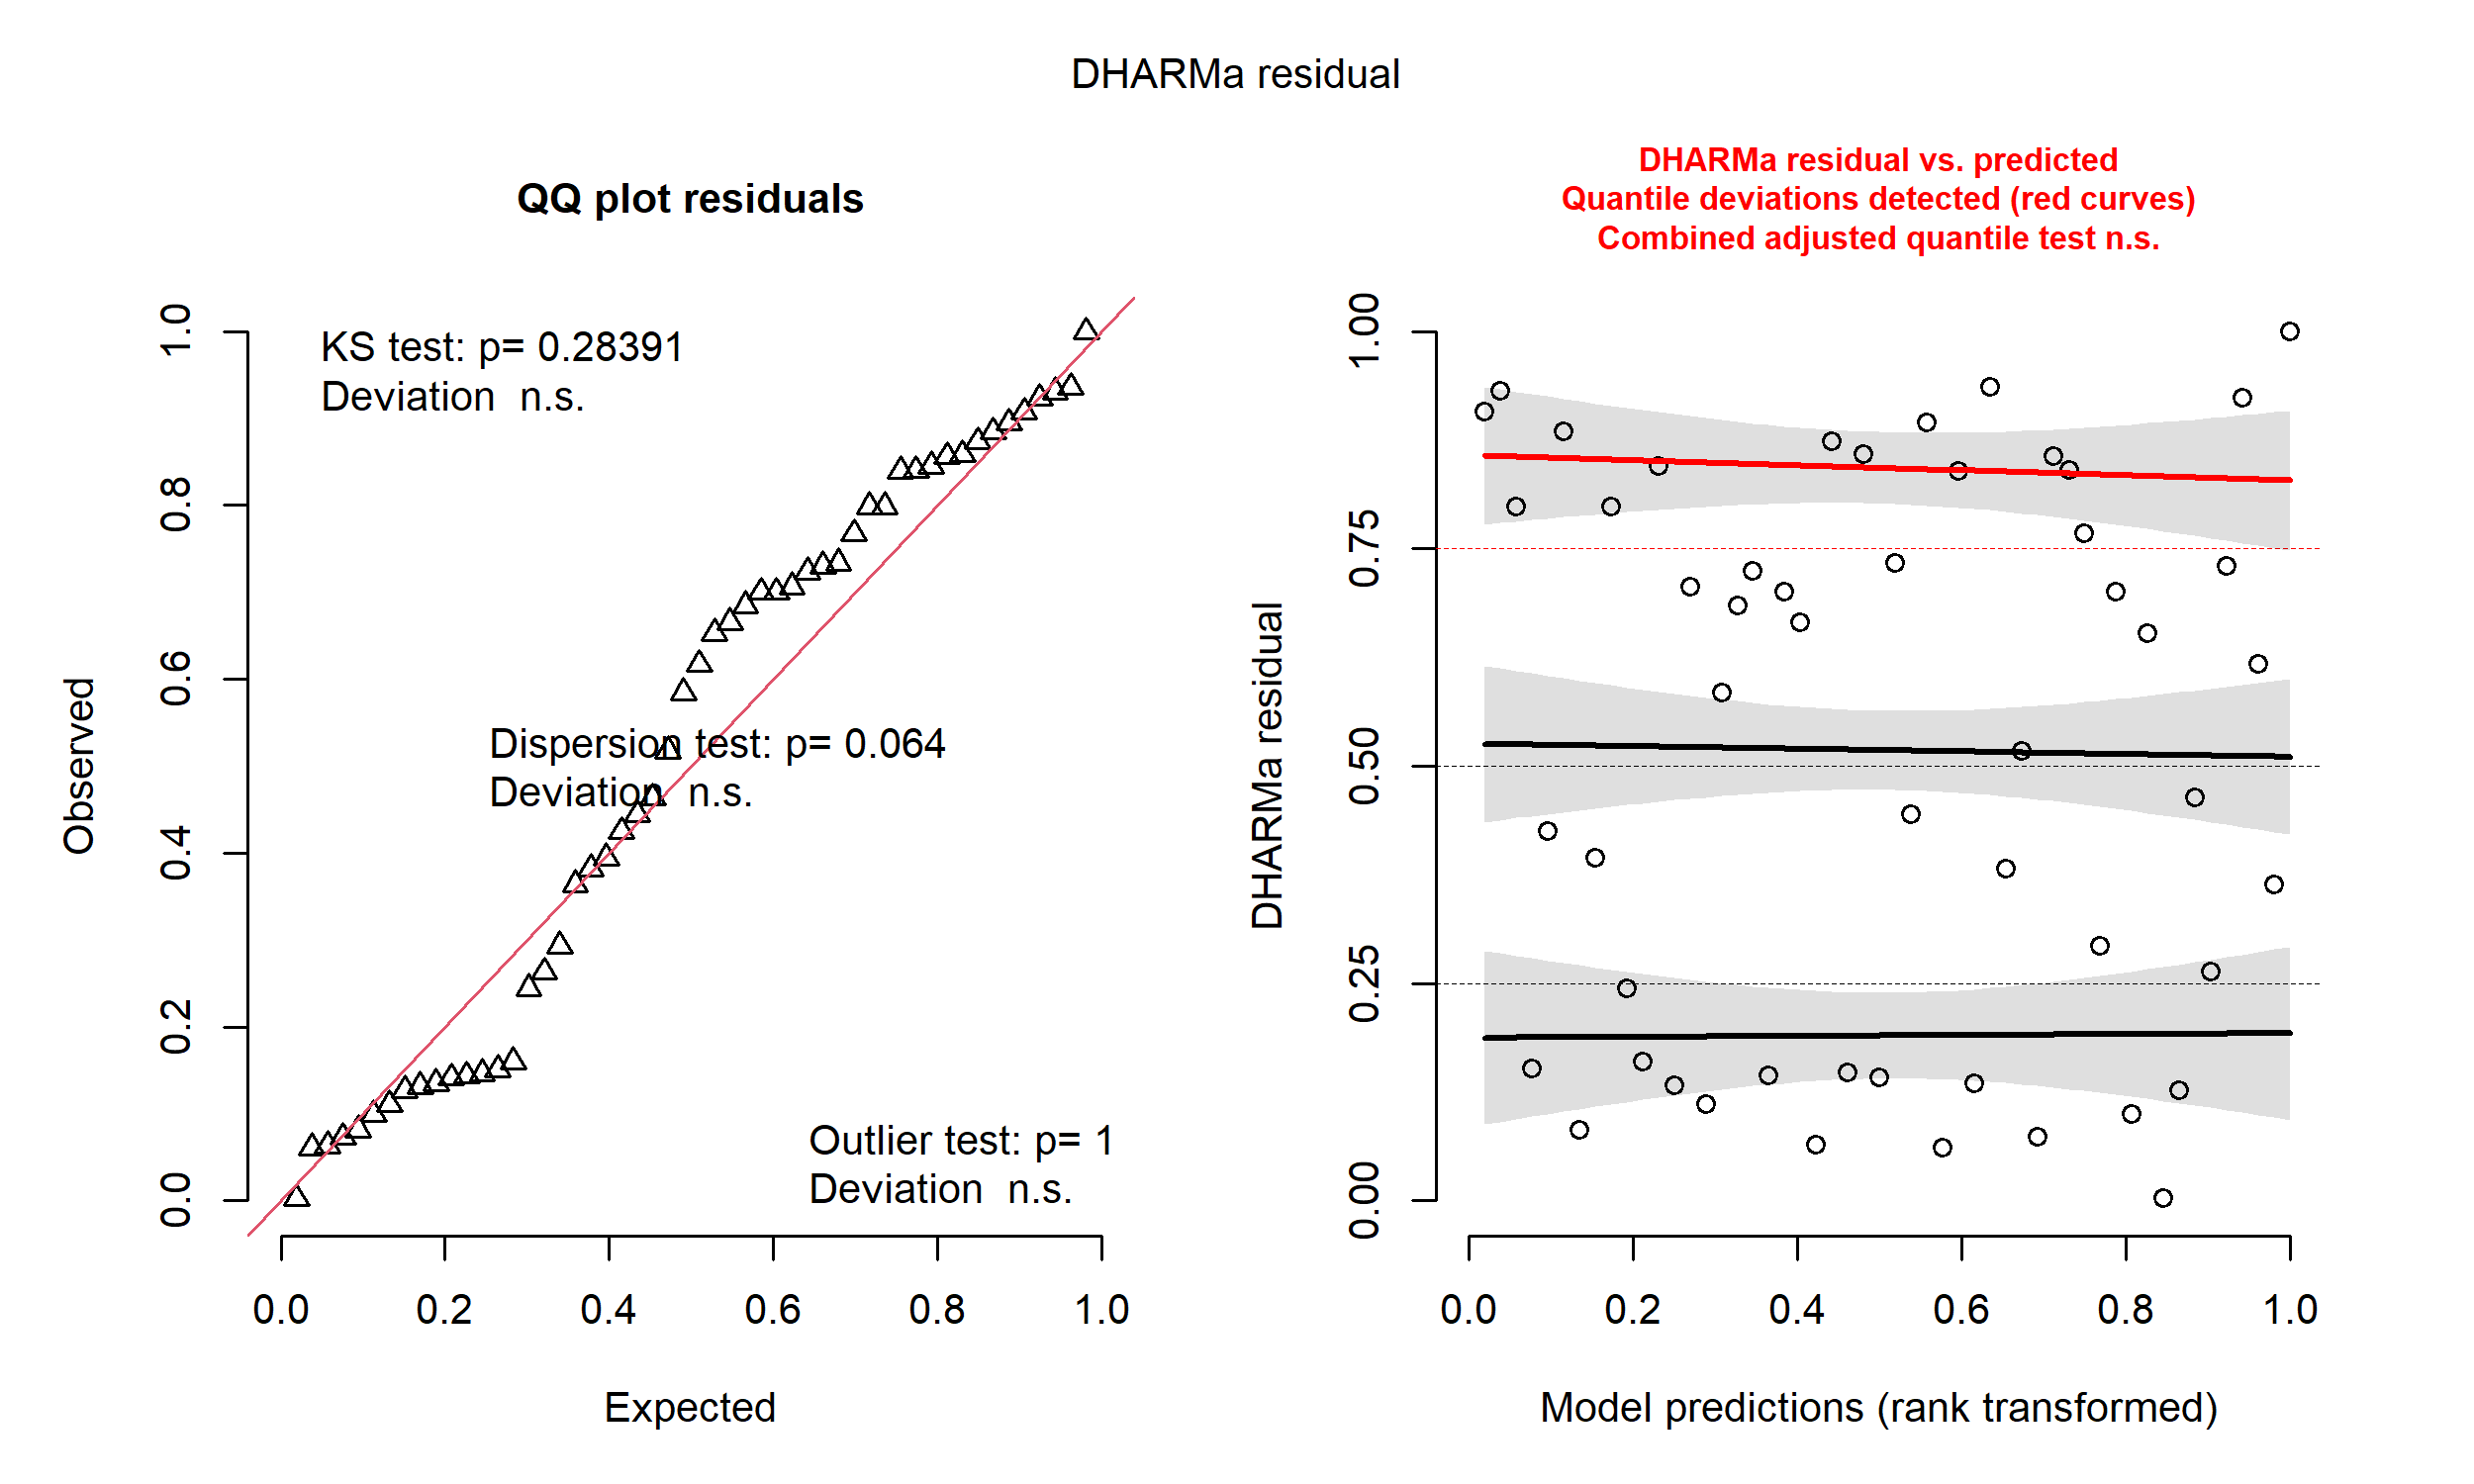


**Supplementary Figure 1.**

**DHARMa residual diagnostics for the model of holotype retention**. (a) Q-Q plot of scaled residuals against uniform distribution. (b) Residuals plotted against model predictions. A significant deviation in one diagnostic test does not necessarily invalidate our results when considered alongside others. The QQ plots indicated a generally good fit, and residual plots showed only minor deviations in one or two quantiles. This is not a major concern, particularly given our reasonably sample size.


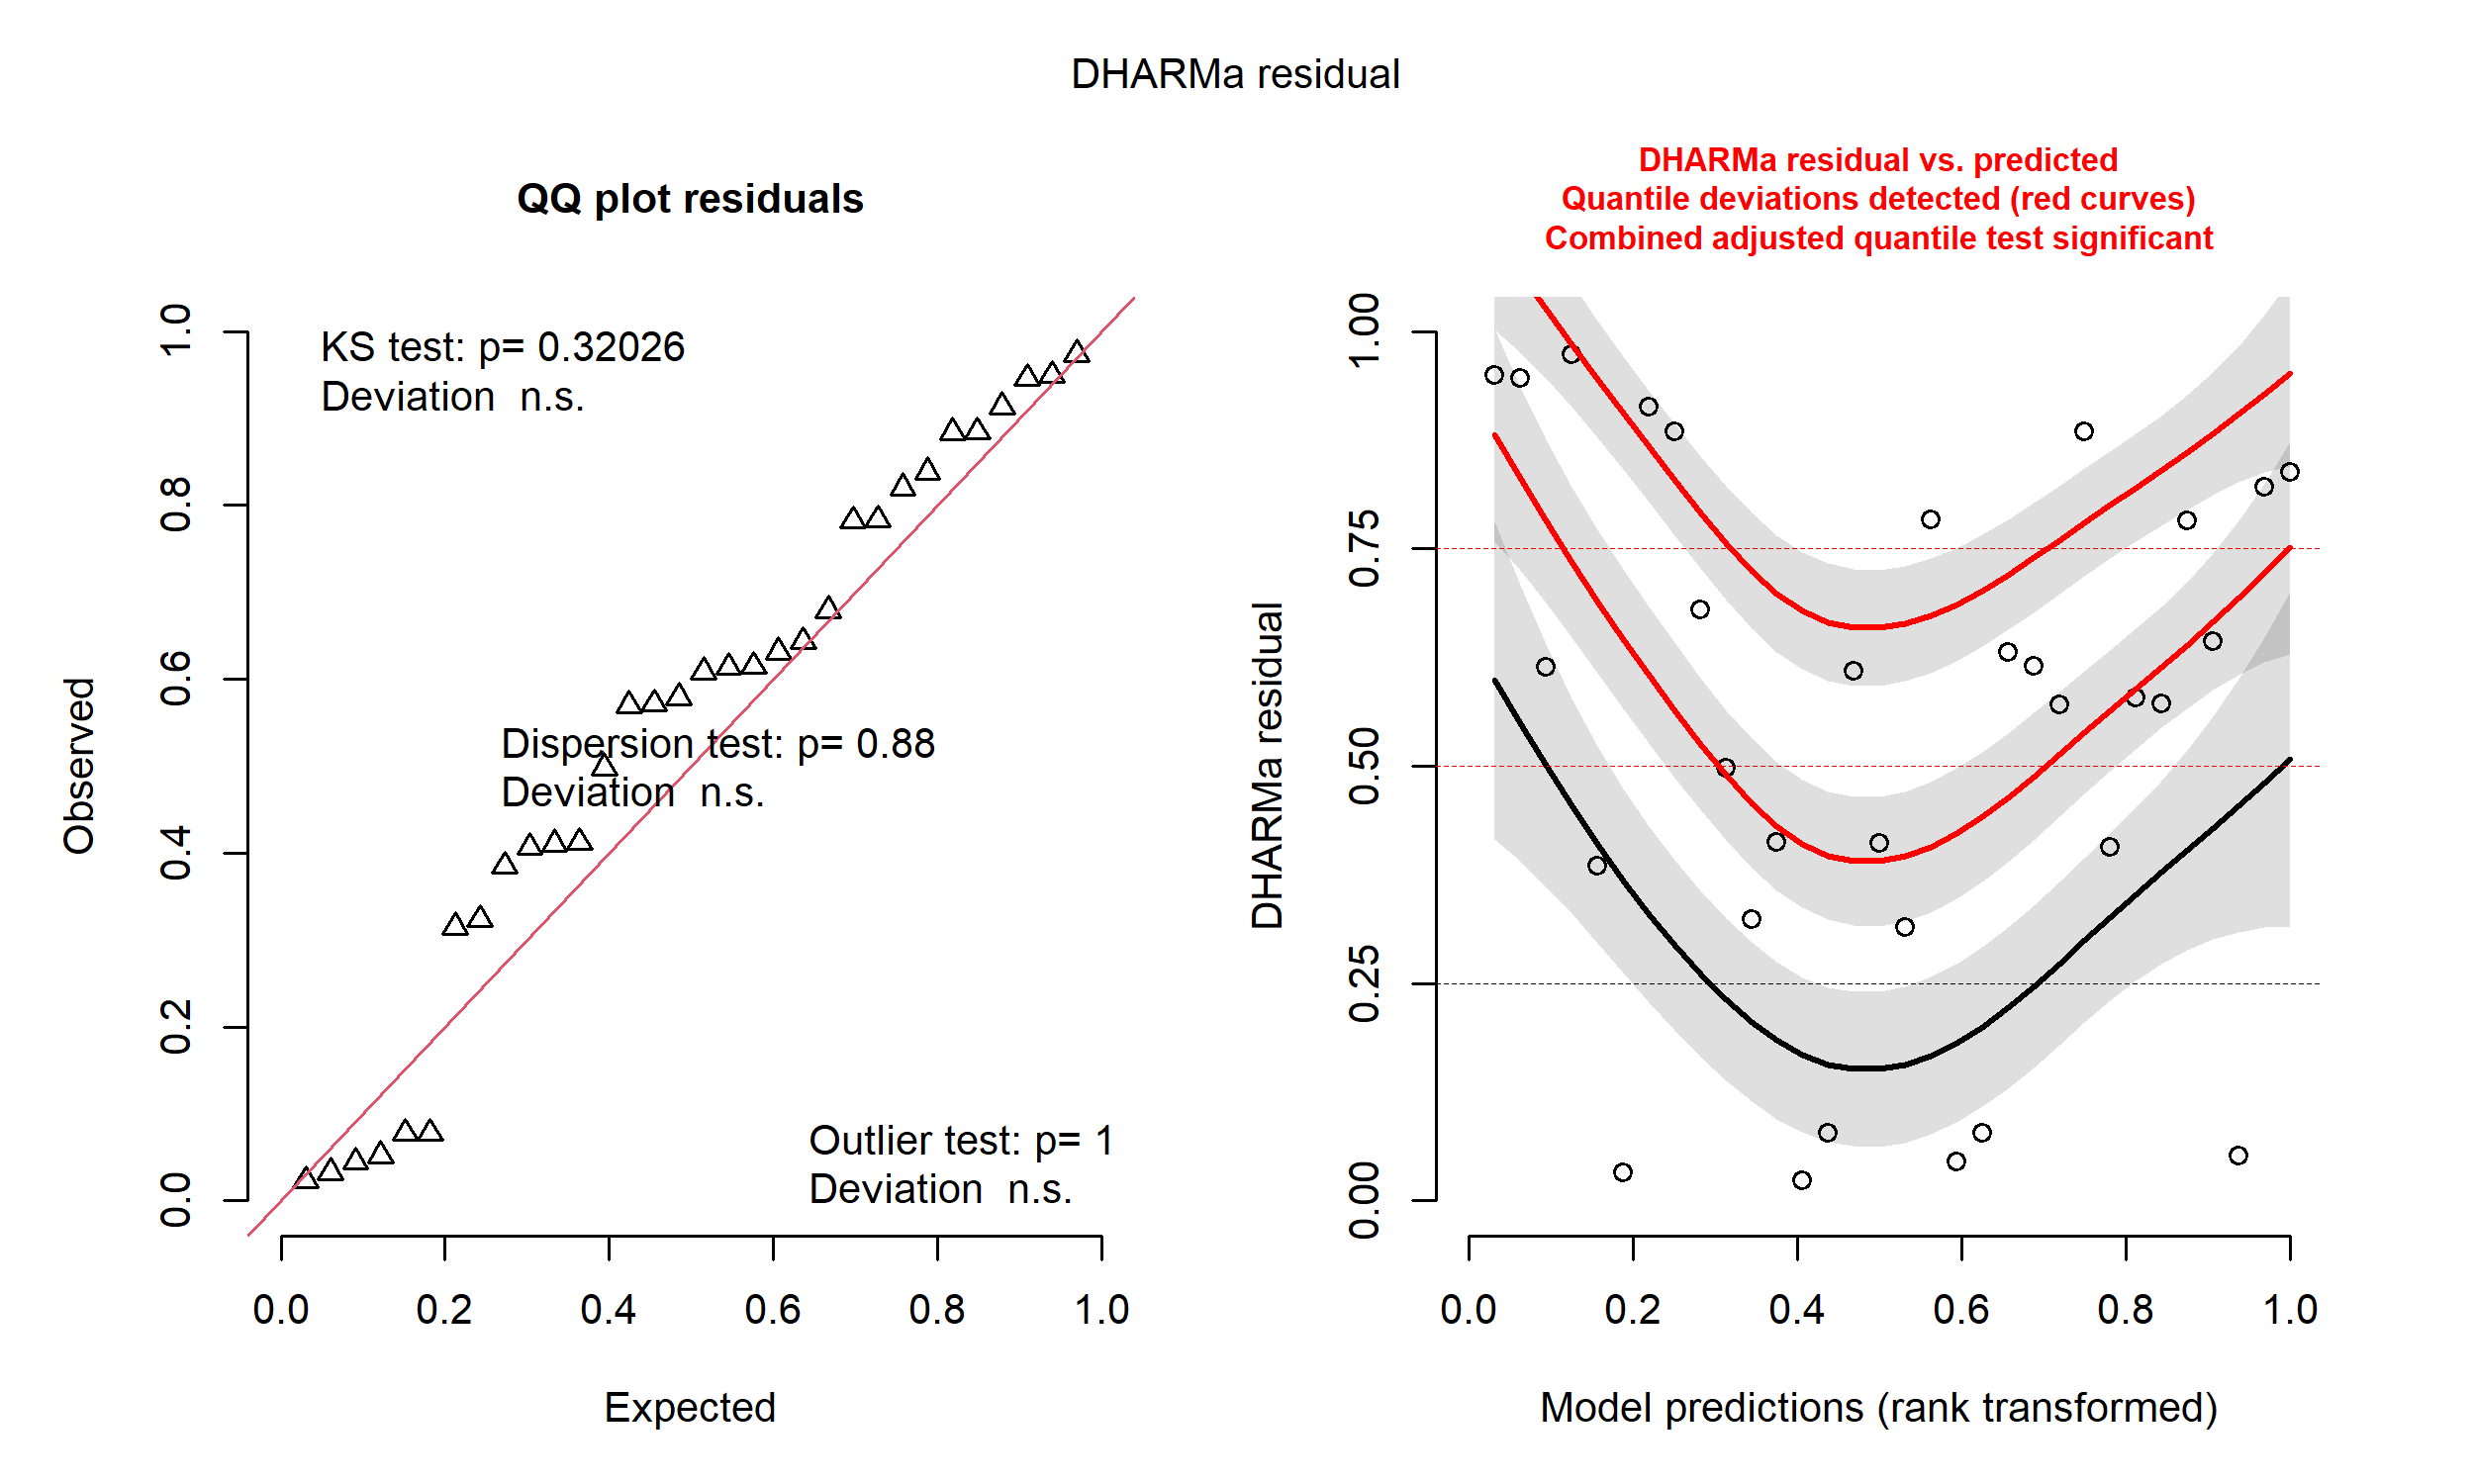


**Supplementary Figure 2.**

**DHARMa residual diagnostics for the model of holotype appropriation**. (a) Q-Q plot of scaled residuals against uniform distribution. (b) Residuals plotted against model predictions. A significant deviation in one diagnostic test does not necessarily invalidate our results when considered alongside others. The QQ plots indicated a generally good fit, and residual plots showed only minor deviations in one or two quantiles. This is not a major concern, particularly given our reasonably sample size.


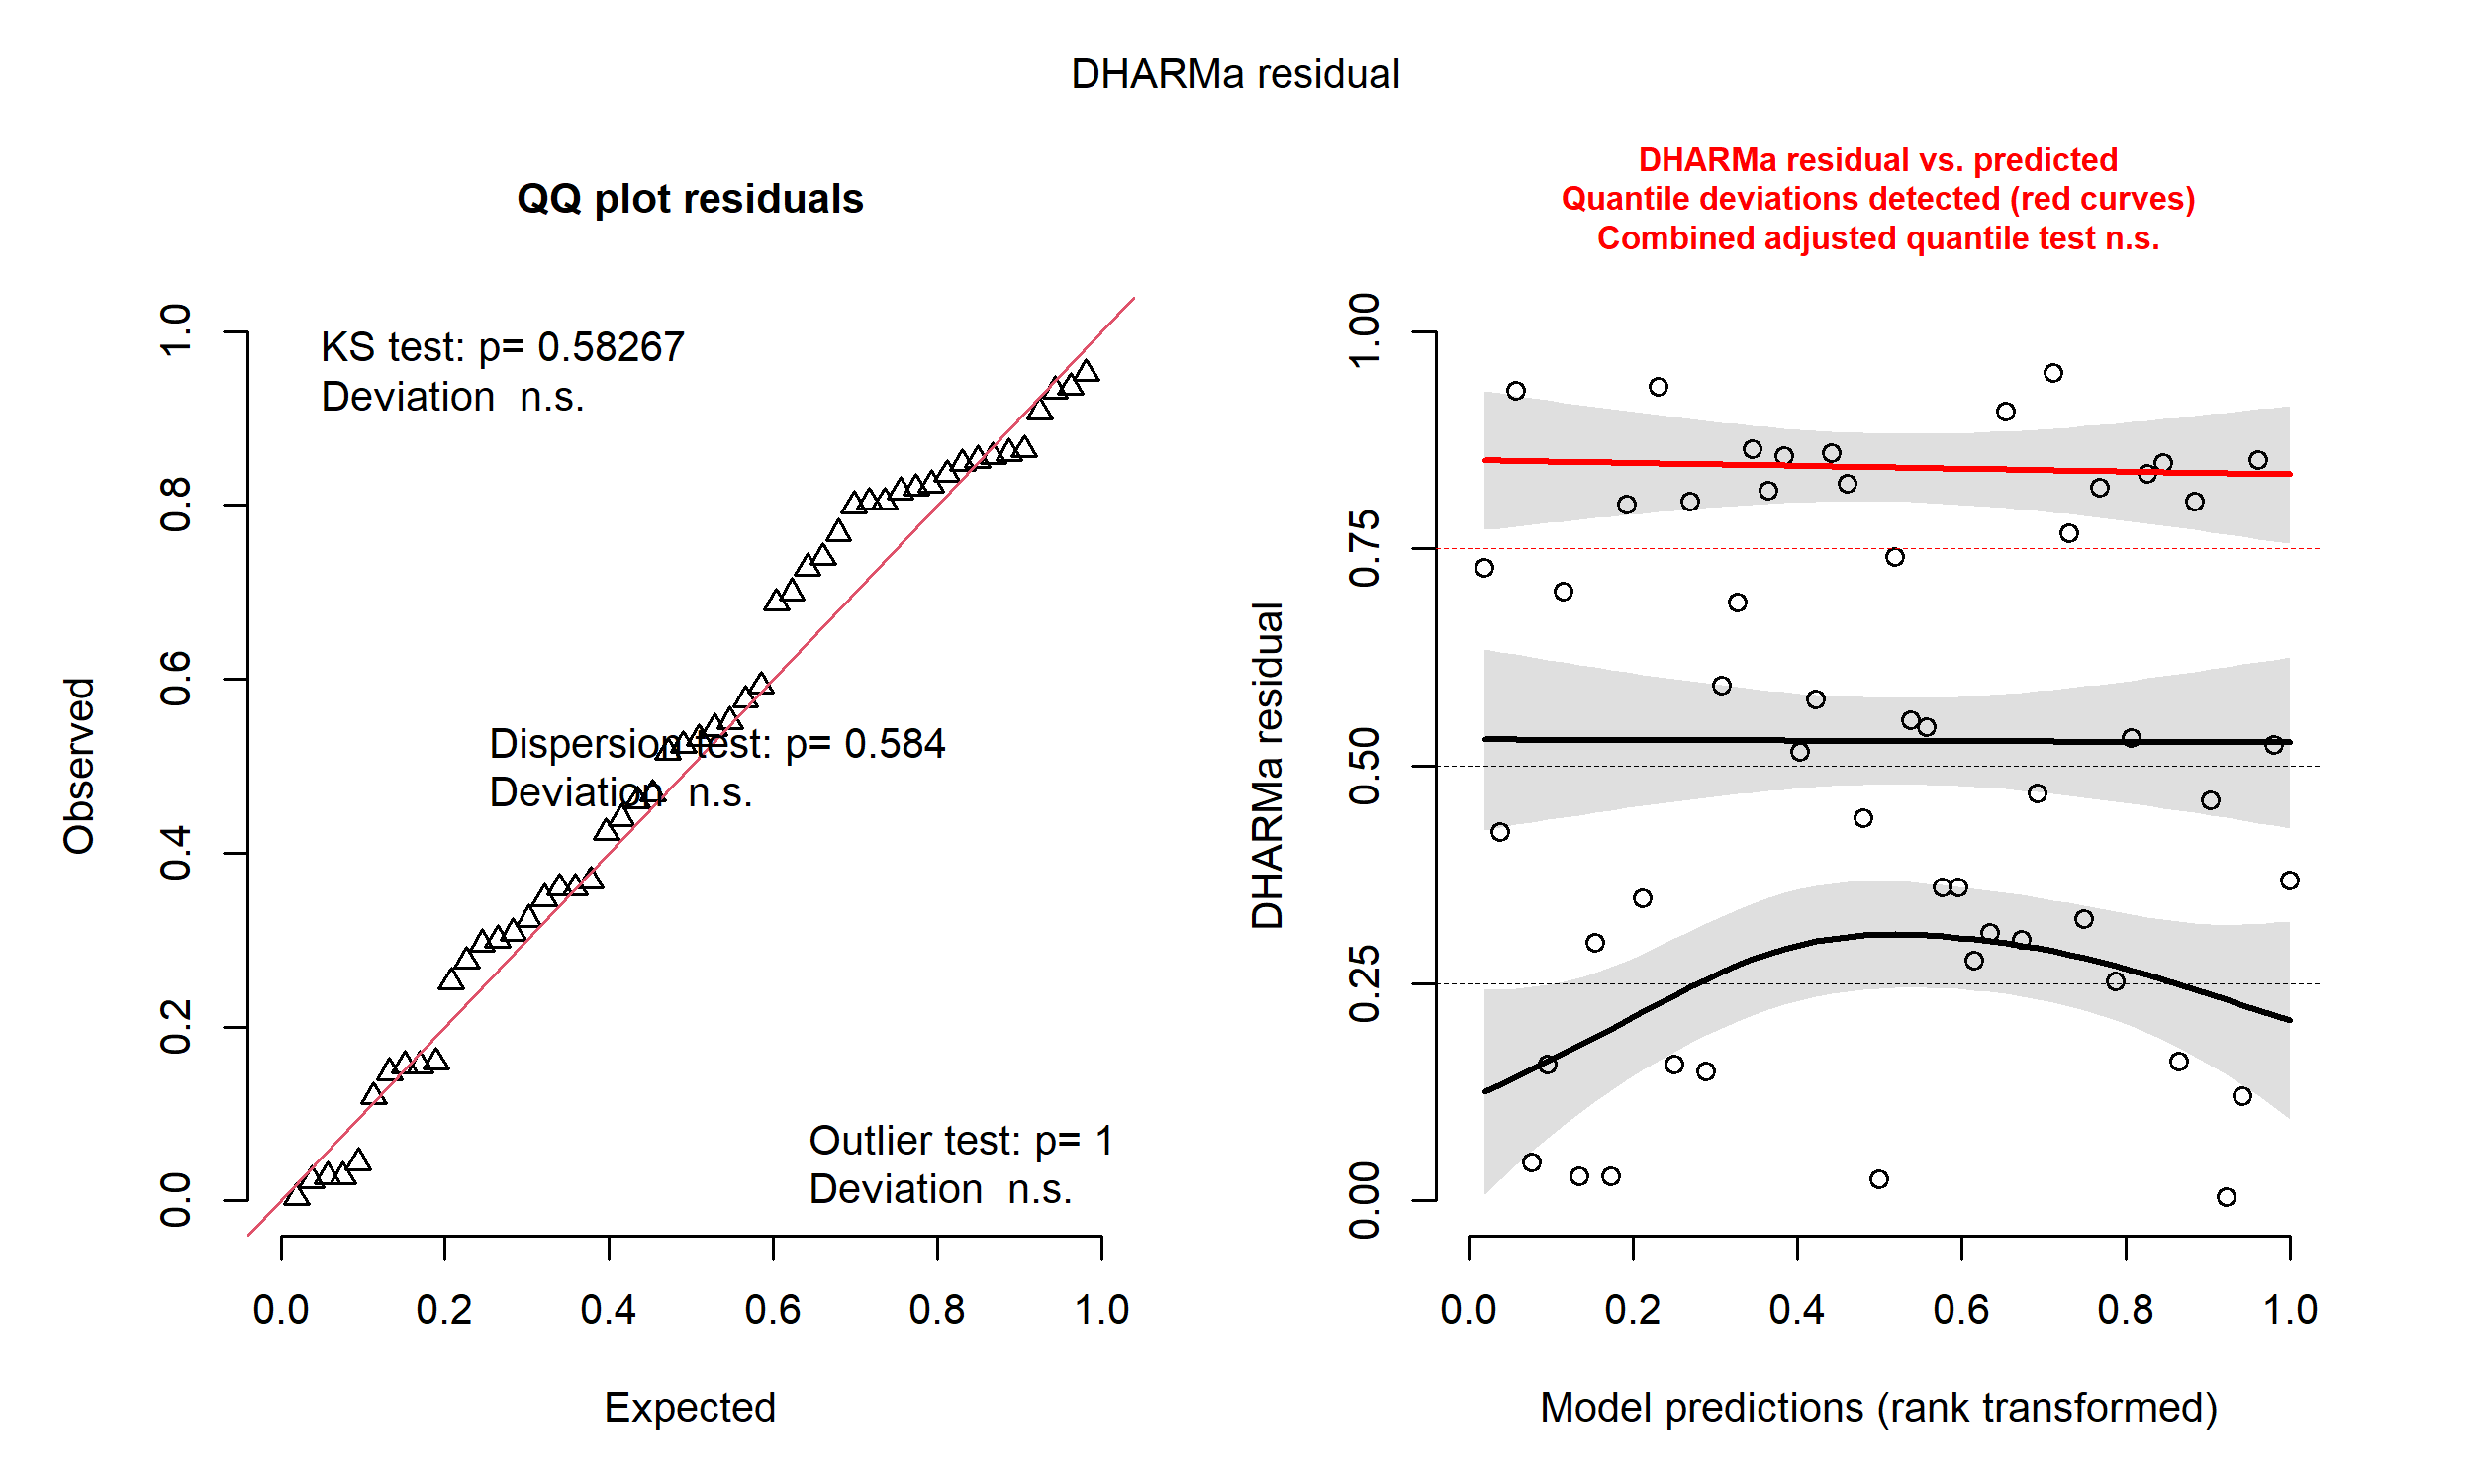


**Supplementary Figure 3.**

**DHARMa residual diagnostics for the model of holotype outflow centrality**. (a) Q-Q plot of scaled residuals against uniform distribution. (b) Residuals plotted against model predictions. A significant deviation in one diagnostic test does not necessarily invalidate our results when considered alongside others. The QQ plots indicated a generally good fit, and residual plots showed only minor deviations in one or two quantiles. This is not a major concern, particularly given our reasonably sample size.


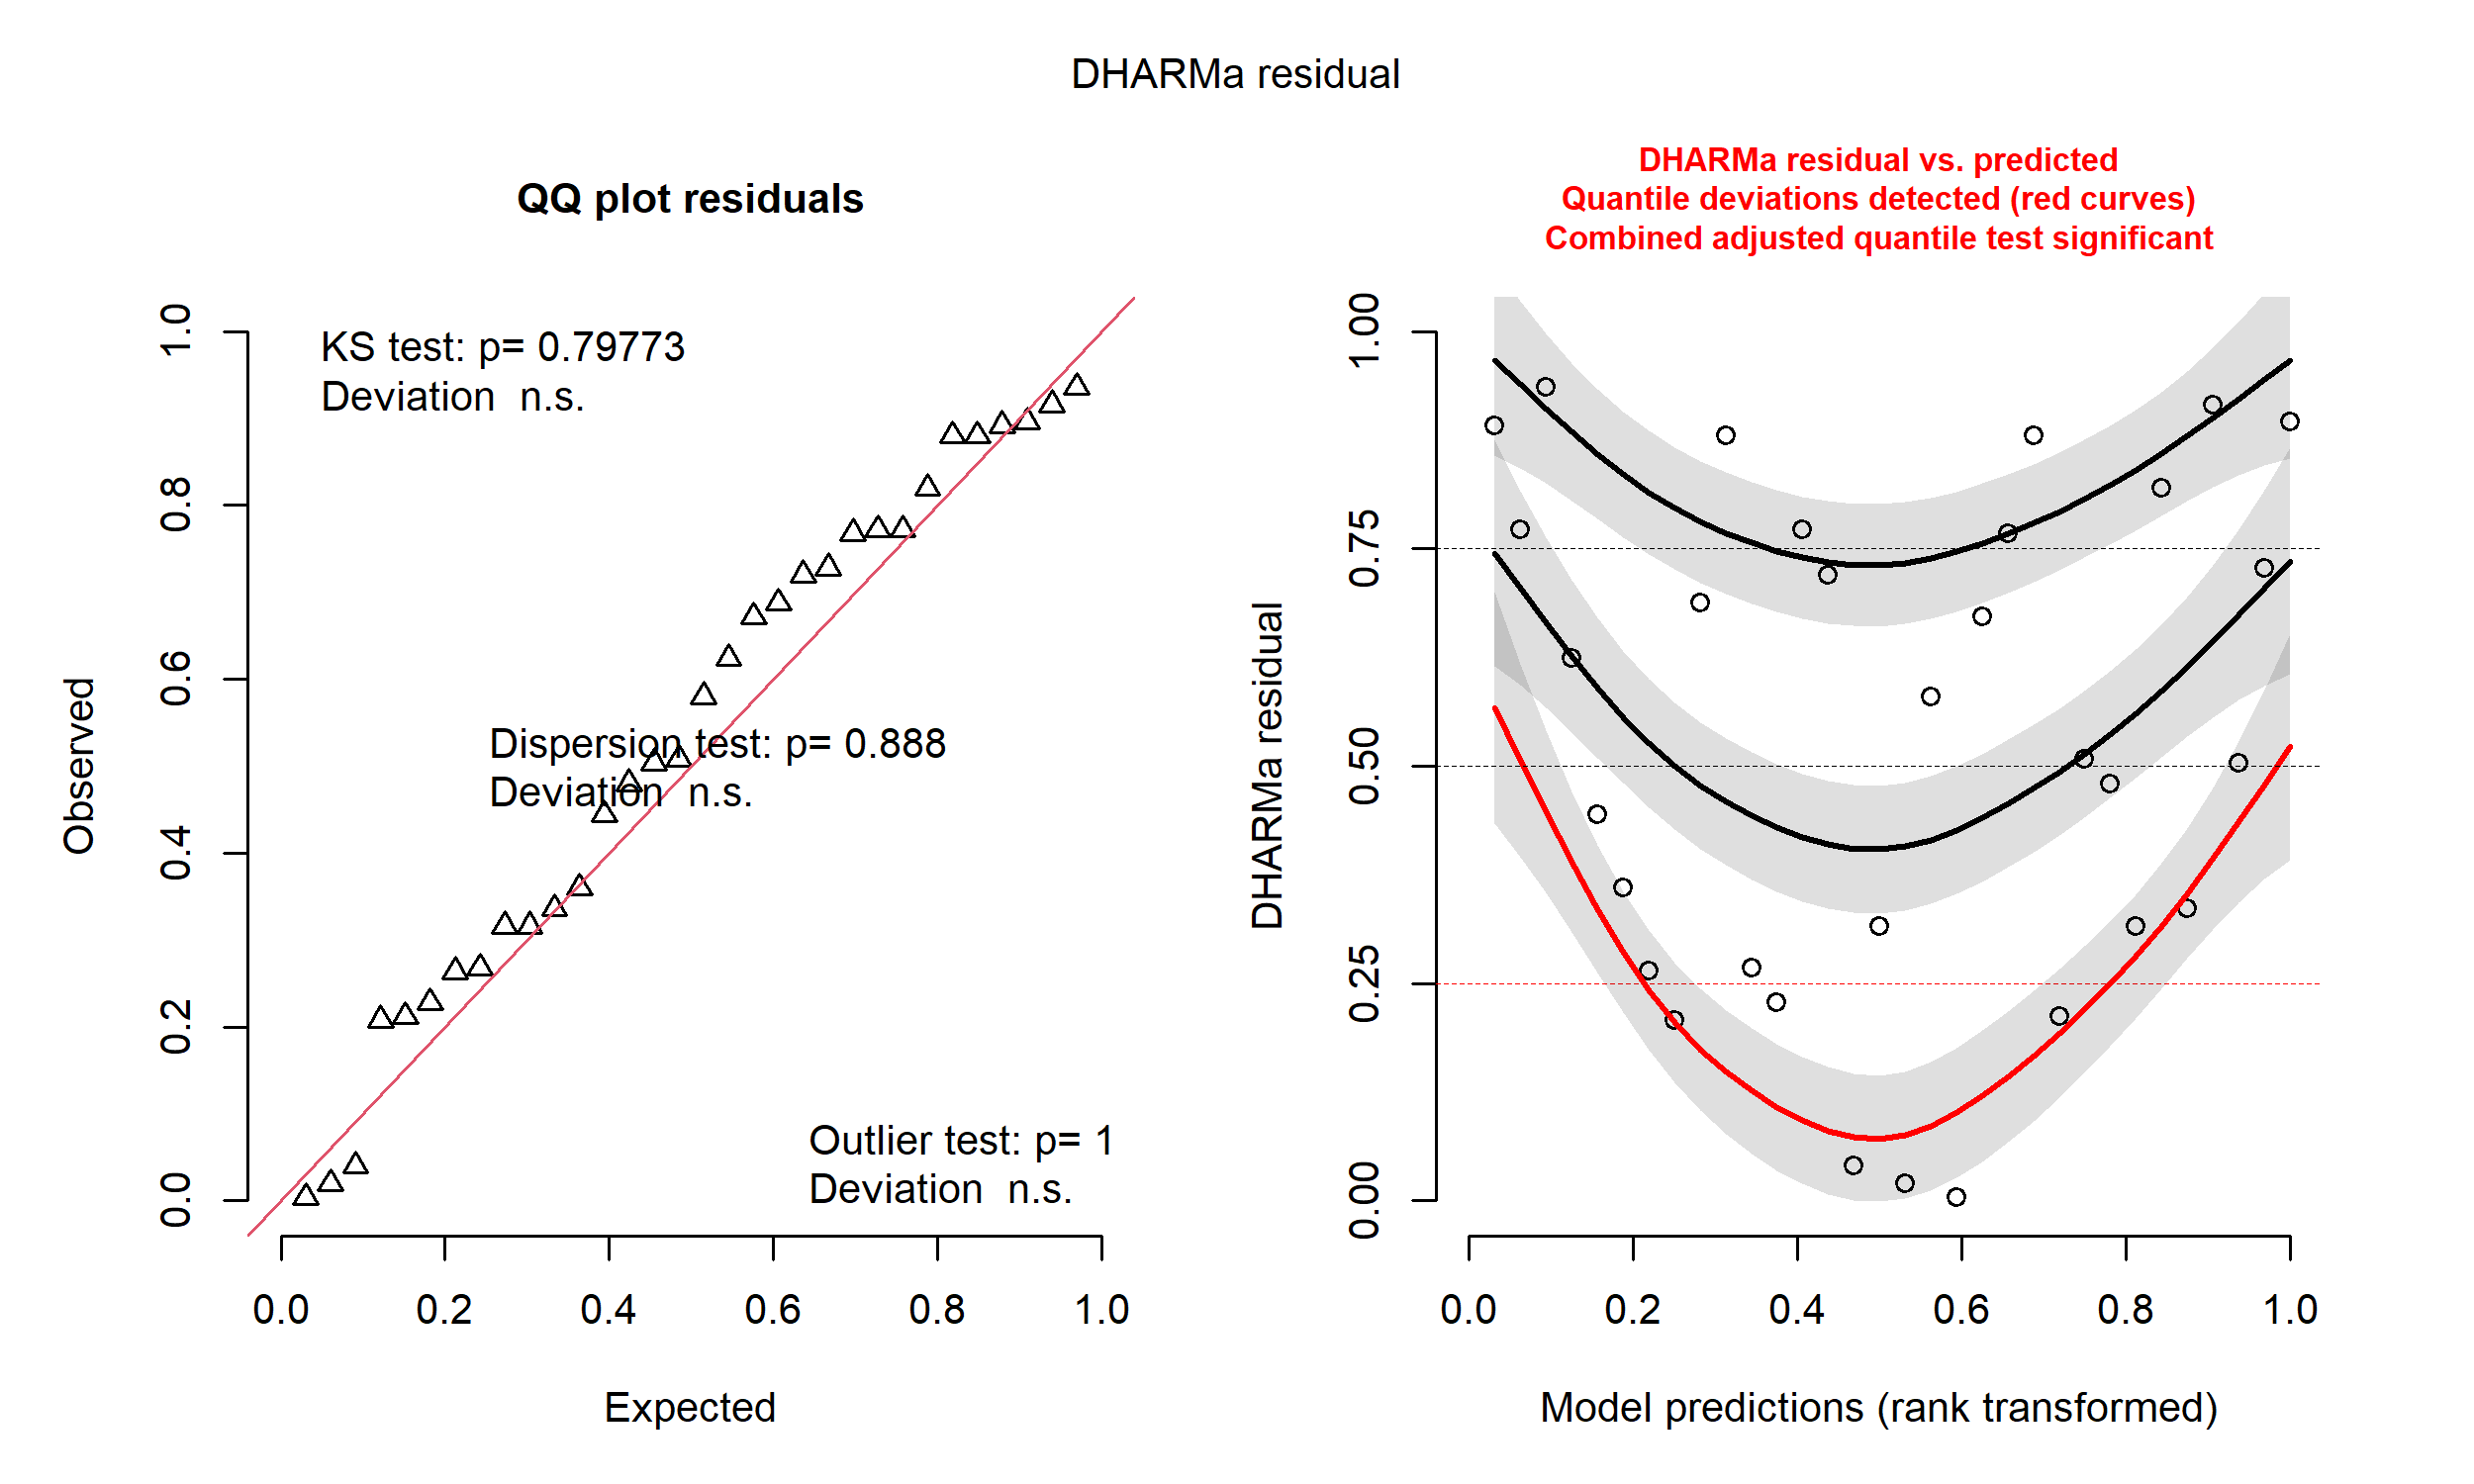


**Supplementary Figure 4.**

**DHARMa residual diagnostics for the model of holotype inflow centrality**. (a) Q-Q plot of scaled residuals against uniform distribution. (b) Residuals plotted against model predictions. A significant deviation in one diagnostic test does not necessarily invalidate our results when considered alongside others. The QQ plots indicated a generally good fit, and residual plots showed only minor deviations in one or two quantiles. This is not a major concern, particularly given our reasonably sample size.
